# Supplementary material
Source: PubMed Central journal article supplement (PMC4788262)
Supplement: shea884551.ww2_default.pdf [file shea884551.ww2_default.pdf]

**Appendix 2: History of the National Programme for IT and its Local Service Providers and suppliers for the NHS Care Records Service [posted as supplied by author]**

|                                                                                                                                                                                                                                                                                                                                                                                                                                                                                                                                                                                                                                                                                                                                        |
|----------------------------------------------------------------------------------------------------------------------------------------------------------------------------------------------------------------------------------------------------------------------------------------------------------------------------------------------------------------------------------------------------------------------------------------------------------------------------------------------------------------------------------------------------------------------------------------------------------------------------------------------------------------------------------------------------------------------------------------|
| <p><b>1998</b></p> <p>NHS Executive commits to detailed electronic health records</p>                                                                                                                                                                                                                                                                                                                                                                                                                                                                                                                                                                                                                                                  |
| <p><b>2002</b></p> <p>National Programme for IT for England (the Programme) starts</p> <p>Richard Granger appointed NHS Information Technology Director</p>                                                                                                                                                                                                                                                                                                                                                                                                                                                                                                                                                                            |
| <p><b>2003/4</b></p> <p>British Telecom awarded contract for the central database and messaging service, the NHS Spine</p> <p>Local Service Provider 10-year contracts awarded:</p> <p>Computer Sciences Corporation - North West and West Midland cluster; British Telecom Capital Care Alliance – London cluster; Fujitsu - Southern cluster; Accenture - North East and Eastern England clusters</p> <p>Computer Sciences Corporation plans to work with subcontracted supplier, iSOFT, to develop a new application, Lorenzo; British Telecom and Fujitsu plan to work with subcontracted supplier, IDX Corporation, to implement the application, Carecast</p> <p>British Telecom awarded N3 (NHS broadband network) contract</p> |
| <p><b>2005</b></p> <p>NHS Connecting for Health set up to deliver the Programme</p> <p>British Telecom contract re-set 1 for “interim solutions” in London (until Carecast strategic solution becomes available)</p> <p>Fujitsu replaces IDX as its supplier and subcontracts instead to Cerner to supply Cerner Millennium in the Southern cluster</p>                                                                                                                                                                                                                                                                                                                                                                                |
| <p><b>2006</b></p> <p>Accenture withdraws as Local Service Provider; Computer Sciences Corporation awarded 9-year contract for Accenture’s former clusters</p> <p>British Telecom drops Carecast as a London-wide solution and appoints Cerner as its main subcontractor for acute hospitals in London</p> <p>“New Route Map” for London proposals include:</p> <p>“best of breed” approach, i.e., three main subcontracted suppliers instead of one – to supply Cerner Millennium for acute Trusts; RiO for community and mental health; and INPS Vision for general practice</p> <p>London-wide integration engine, connected to the NHS Spine, proposed to enable London shared Patient Records</p>                                 |

**2007**

National Local Ownership Programme introduced (devolved responsibility for local delivery of the Programme from NHS Connecting for Health to groupings of Strategic Health Authorities; replaces original, 5 clusters with 3 Programme areas - Southern (Local Service Provider, Fujitsu), London (Local Service Provider, British Telecom) and North Midlands and East (Local Service Provider, Computer Sciences Corporation)

British Telecom contract re-set 2 for “best of breed” London solutions

**2008**

Fujitsu Local Service Provider contract in Southern area terminated, leaving no Local Service Provider in Southern area

British Telecom contract re-set 3 negotiations for New Delivery Model in London (to permit London Trusts – limited – opportunities for local configuration and build of Cerner Millennium; mixing components from originally planned Release Bundles)

Richard Granger, head of NHS Connecting for Health, leaves in January; Gordon Hextall, acting head, leaves in April; Christine Connelly and Martin Bellamy appointed to jointly lead NHS Connecting for Health in September

**2009**

British Telecom awarded additional contract to take over 8, formerly Fujitsu/Cerner Millennium Trusts (7 following merger of 2 Trusts), plus 25 Trusts for RiO and 4 additional acute Trusts in Southern area

Other Southern Trusts given choice of Local Service Provider solution from British Telecom or Computer Sciences Corporation or from various suppliers

Martin Bellamy, Director of Programmes and Systems Delivery, NHS Connecting for Health, resigns NHS Connecting for Health, headed by Christine Connelly, Chief Information Officer for Health at the Department of Health, is integrated with the Department of Health Informatics Directorate

Parliamentary announcement of contract renegotiations with British Telecom and Computer Sciences Corporation /seeking National Programme for IT cost savings

**2010/11**

May: UK General Election: New Labour Government replaced by a Conservative-Liberal Democrat Coalition Government

New Memorandum of Agreement signed between British Telecom and NHS Connecting for Health for reduced number of NHS Care Records Service deployments in London; also negotiations to pare back Local Service Provider contract with Computer Sciences Corporation

London-wide integration engine plan dropped

Government review of the Programme confirms that the original, standardised “replace all” approach is to be replaced with a (standards and interoperability-based) “connect all” approach; NHS IT markets opened up to multiple suppliers

Outcome of a Department of Health Public Consultation on NHS IT expected in 2011
